# Supplementary material
Source: publisher site journal article supplement (https://www.dovepress.com/article/567810)
Supplement: Supplementary file 1 [file Supplementary%20Tables.docx]

Supplementary table S1. Self-evaluated generic skills related to epidemiology learning exercise.

| By solving the case, I have learned… | Meana | Distribution of answers in percentagesb | | | | |
| --- | --- | --- | --- | --- | --- | --- |
| 4 = a lot | 3 = quite a lot | 2 = little | 1 = not at all | 0 = I can´t say |
| critical thinking skills | 2.4  (2.3–2.5) | 3.1  (1.3–7.1) | 42.9  (35.5–50.9) | **44.1**  **(36.7–51.8)c** | 6.2  (3.4–11.1) | 3.7  (1.7–7.9) |
| Reasoning skills | 2.8  (2.7–2.9) | 14.9  (10.2–21.2) | **52.8**  **(45.1–60.4)** | 28.0  (21.6–35.3) | 3.1  (1.3–7.1) | 1.2  (0.3–4.4) |
| problem-solving skills | 2.7  (2.6–2.8) | 13.0  (8.7–19.1) | **52.8**  **(45.1–60.4)** | 28.0  (21.6–35.3) | 4.4  (2.1–8.7) | 1.9  (0.6–5.3) |
| Information-processing skills | 2.7  (2.6–2.8) | 14.9  (10.2–21.2) | **43.5**  **(36.1–51.2)** | 31.1  (24.4–38.6) | 4.4  (2.1–8.7) | 1.2  (0.3–4.4) |
| teamwork skills | 1.5  (1.4–1.6) | 1.2  (0.3–4.4) | 11.8  (7.7–17.7) | 36.0  (29.0–43.7) | **42.2**  **(34.9–50.0)** | 8.7  (5.3–14.1) |
| communication skills | 1.5  (1.4–1.6) | 2.5  (1.0–6.2) | 9.3  (5.7–14.8) | 30.4  (23.9–37.9) | **52.2**  **(44.5–59.8)** | 5.6  (3.0–10.3) |
| ethical practice skills | 1.7  (1.6–1.8) | 0.6  (0.1–3.4) | 13.7  (9.2–19.8) | **45.3**  **(37.9–53.1)** | 32.9  (26.1–40.5) | 7.5  (4.3–12.6) |
| Creativity skills | 2.4  (2.3–2.5) | 75  (4.3–12.6) | **43.5**  **(36.1–51.2)** | 36.7  (29.6–44.3) | 9.3  (5.7–14.8) | 3.1  (1.3–7.1) |
| computer skills | 1.7  (1.6–1.8) | 3.1  (1.3–7.1) | 11.8  (7.7–17.7) | 35.4  (28.4–43.1) | **48.5**  **(40.9–56.1)** | 1.2  (0.3–4.4) |
| continuous learning skills | 2.2  (2.0–2.4) | 8.1  (4.8–13.3) | **34.8**  **(27.9–42.4)** | 33.5  (26.7–41.1) | 13.7  (9.2–19.8) | 9.9  (6.2–15.5) |

a 95% confidence intervals are presented in parenthesis.

b 95% confidence intervals are presented in parenthesis.

c Highest percentages per each skill are in bold.

Supplementary table S2. Self-evaluated generic skills in related to bacteriology learning exercise.

| By solving the case, I have learned… | Meana | Distribution of answers in percentagesb | | | | |
| --- | --- | --- | --- | --- | --- | --- |
| 4 = a lot | 3 = quite a lot | 2 = little | 1 = not at all | 0 = I can´t say |
| critical thinking skills | 2.2  (2.1–2.3) | 5.2  (2.9–9.4) | 35.6  (29.2–42.6) | **45.6**  **(38.6–52.6)c** | 5.8  (3.3–10.0) | 7.9  (4.8–12.6) |
| reasoning skills | 3.0  (2.9–3.1) | 26.7  (20.9–33.4) | **54.5**  **(47.4–61.4)** | 16.8  (12.1–22.7) | 1.1  (0.3–3.7) | 1.1  (0.3–3.7) |
| problem-solving skills | 2.9  (2.8–3.0) | 23.0  (17.6–29.5) | **50.3**  **(43.2–57.3)** | 25.1  (19.5–31.7) | 0.5  (0.1–2.9) | 1.1  (0.3–3.7) |
| Information-processing skills | 3.0  (2.9–3.1 | 20.4  (15.3–26.7) | **58.1**  **(51.0–64.9)** | 19.4  (14.39–25.6) | 0.5  (0.1–2.9) | 1.6  (0.5–4.5) |
| teamwork skills | 1.2  (1.1–1.3) | 2.1  (0.8–5.3) | 4.7  (2.5–8.7) | 25.7  (20.0–32.3) | **35.6**  **(29.2–42.6)** | 21.5  (16.2–27.8) |
| communication skills | 1.4  (1.3–1.5) | 1.6  (0.5–4.5) | 10.0  (6.5–15.0) | 25.1  (19.5–31.7) | **49.7**  **(42.7–56.8)** | 13.6  (9.5–19.2) |
| ethical practice skills | 1.2  (1.1–1.3) | 1.1  (0.3–3.7) | 3.7  (1.8–7.4) | 24.6  (19.0–31.2) | **51.3**  **(44.3–58.3)** | 19.4  (14.4–25.6) |
| Creativity skills | 2.6  (2.5–2.7) | 8.9  (5.6–13.8) | **49.2**  **(42.2–56.3)** | 37.7  (31.1–44.8) | 2.6  (1.12–6.0) | 1.6  (0.5–4.5) |
| computer skills | 1.7  (1.6–1.8) | 4.7  (2.5–8.7) | 10.0  (6.5–15.0) | 36.7  (30.1–43.7) | **44.5**  **(37.6–51.6)** | 4.2  (2.1–8.1) |
| continuous learning skills | 2.4  (2.2–2.6) | 11.5  (7.7–16.8) | **38.7**  **(32.1–45.8)** | 34.0  (27.7–41.0) | 6.3  (3.6–10.7) | 9.4  (6.0–14.4) |

a 95% confidence intervals are presented in parenthesis.

b 95% confidence intervals are presented in parenthesis.

c Highest percentages per each skill are in bold.
